# Supplementary material for: Determinants of unmet need for family planning in Gambia & Mozambique: implications for women’s health
Source: Springer Nature journal article supplement (doi:10.1186/s12905-021-01267-8), 2021-03-23

## Research Methodology Flowchart

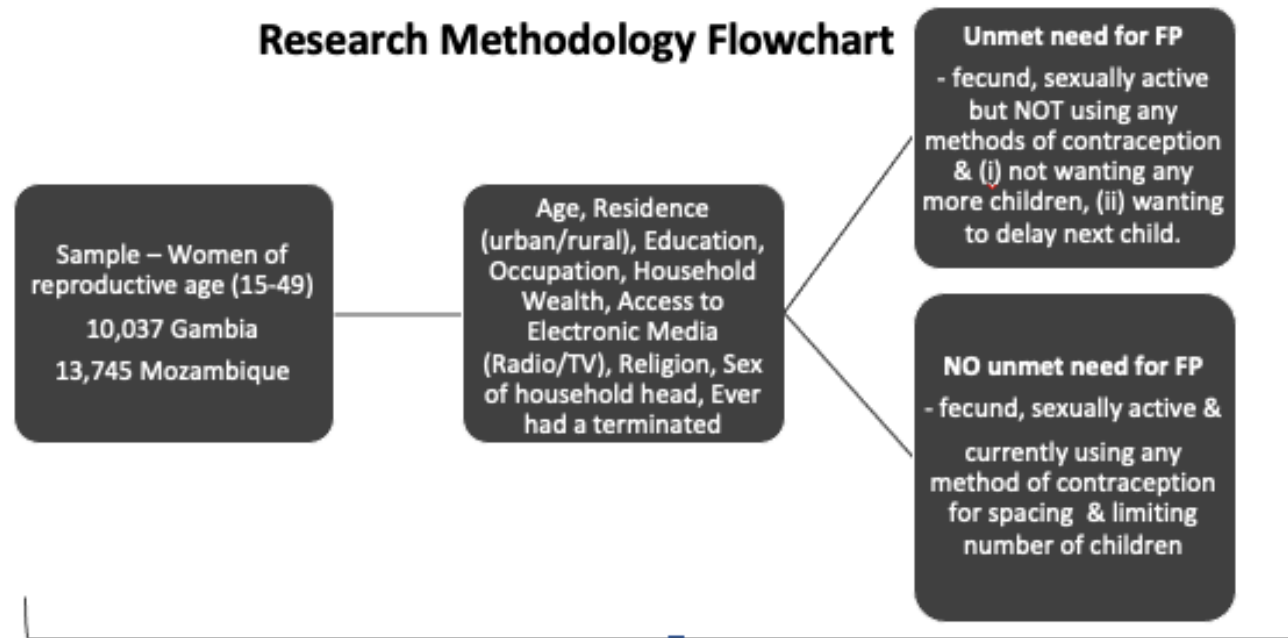

## Quantitative Research

### Statistical Analysis Software

STATA version 14.0  
`svy` & `svyset` commands  
 accounts for Demographic &  
 Health Survey complex cluster  
 sampling design

95% Confidence Intervals

Level of significant set at alpha  
 value of 5%

FP = Family Planning  
 VIF = Variance Inflation Factor

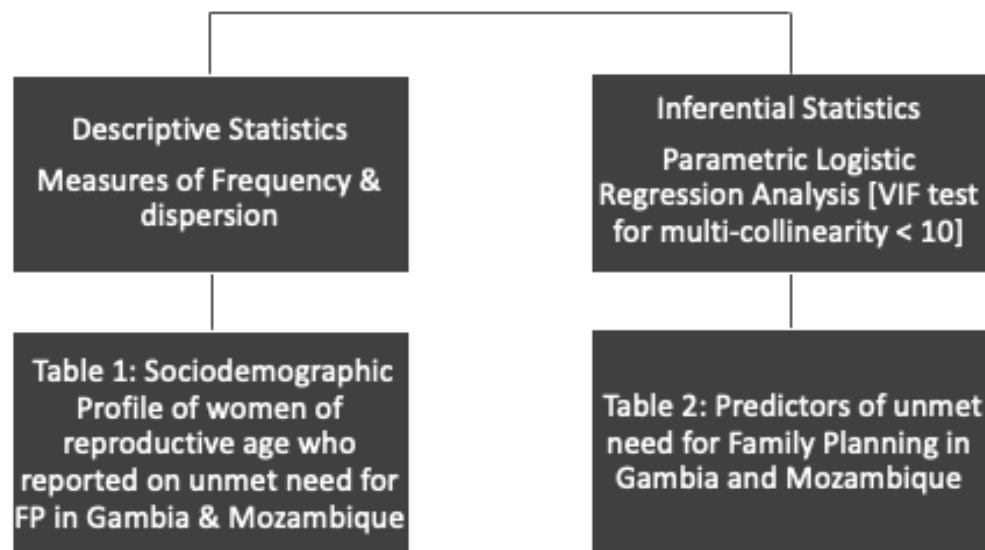

Supplement: MOESM1 [file 18995588]
